# Supplementary material
Source: publisher site journal article supplement (https://www.dovepress.com/article/588300)
Supplement: Supplementary file 1 [file 588300%20Supplementary%20Material.pdf]

## Electronic Supplementary File 1. Literature review on attributes and levels of antihypertensive drugs

| ID                                  | Patients                                                                          | Intervention         | Comparison     | Outcomes                                                                                                                                                                                                                                                                                                                                                                                                  | Type of evidence |
|-------------------------------------|-----------------------------------------------------------------------------------|----------------------|----------------|-----------------------------------------------------------------------------------------------------------------------------------------------------------------------------------------------------------------------------------------------------------------------------------------------------------------------------------------------------------------------------------------------------------|------------------|
| ALLHAT Officers and Coordinators[1] | High blood pressure and at least one other risk factor for coronary heart disease | Amlodipine           | Chlorthalidone | Stroke: 6-year incidence was 5.6% in the chlorthalidone group, 5.4% in the amlodipine group (RR 0.93; 95%CI 0.82 to 1.06), and 6.3% in the lisinopril group (RR 1.15; 95%CI 1.02 to 1.30).<br>Lisinopril vs chlorthalidone: 6-year rates of combined CVD (33.3% vs 30.9%; RR 1.10, 95%CI 1.05 to 1.16); Stroke (6.3% vs 5.6%; RR1.15, 95%CI 1.02 to 1.30); HF (8.7% vs 7.7%; RR 1.19, 95%CI 1.07 to 1.31) | RCT              |
| Dahlöf B 2002[2]                    | Hypertension                                                                      | Losartan             | Atenolol       | Intervention: SBP -30.2/-16.6 mmHg (SD 18.5/10.1)<br>Comparison: SBP -29.1/-16.8 mmHg (SD 19.2/10.1)<br>Primary composite endpoint: RR 0.87, 95%CI 0.77 to 0.98;<br>Die from cardiovascular disease: (RR:0.89, 95%CI 0.73 to 1.07;<br>Fatal or non-fatal stroke:RR: 0.75, 95%CI 0.63-0.89<br>Myocardial infarction (non-fatal and fatal): RR:1.07, 95%CI 0.88-1.31                                        | RCT              |
| Julius S 2004[3]                    | Hypertension                                                                      | Valsartan            | Amlodipine     | BP: -4.0 vs 2.1 mmHg (1 month), -1.3 vs -1.5 mmHg (1 year);<br>Primary composite endpoint: 10.6% (25.5 per 1000 patient-years) vs 10.4% (24.7 per 1000 patient-years); HR 1.04, 95%CI 0.94 to 1.15                                                                                                                                                                                                        | RCT              |
| White WB 2011[4]                    | Hypertension                                                                      | Azilsartan medoxomil | Placebo        | Clinic SBP: AZL-M 40mg -14.6mmHg, 95%CI -17.7 to -11.5;<br>AZL-M 80mg -14.9 mmHg, 95% CI -18.1 to -11.8;<br>Valsartan 320 mg -9.5 mmHg, 95%CI -12.6 to -6.3;<br>Olmesartan 40 mg -11.4 mmHg, 95%CI -14.5 to -8.2                                                                                                                                                                                          | RCT              |

|                       |                           |                                                      |                                                       |                                                                                                                                                                                                                                                                                                                                                                                                                            |                       |
|-----------------------|---------------------------|------------------------------------------------------|-------------------------------------------------------|----------------------------------------------------------------------------------------------------------------------------------------------------------------------------------------------------------------------------------------------------------------------------------------------------------------------------------------------------------------------------------------------------------------------------|-----------------------|
| Trevisol DJ 2012[5]   | Hypertension              | Not specified                                        | -                                                     | The HRQoL of hypertensive patients was significantly lower than that of normotensive patients, particularly in terms of body composition summary and mental component summary.<br>Effect of pharmacological treatment: patients with hypertension who were on antihypertensive drugs and whose blood pressure was controlled had a lower HRQoL compared with hypertensive patients who did not use antihypertensive drugs. | Cross-sectional study |
| Hu D 2014[6]          | Hypertension              | Valsartan/Amlodipine                                 | -                                                     | Mean sitting SBP -27.1 mmHg (159.6 vs. 132.5 mmHg, P < 0.0001);<br>Mean sitting DBP -15.2 mmHg (95.6 vs. 80.4 mmHg, P < 0.0001)<br>AEs: dizziness (0.2%), headache (0.2%), upper respiratory tract infection (0.2%), edema (0.2%)                                                                                                                                                                                          | RWE                   |
| Wong MC 2014[7]       | Hypertension              | Atenolol                                             | Metoprolol                                            | Cardiovascular mortality: 3.7% vs 1.4% (p<0.001)                                                                                                                                                                                                                                                                                                                                                                           | Cohort study          |
| Mohan JC 2015[8]      | Hypertension              | Olmesartan,<br>Amlodipine and<br>Hydrochlorothiazide | -                                                     | AEs (1.39%): Pedal oedema (0.29%); headache (0.16%); giddiness (0.15%), light headedness (0.08%); stroke (0.06%)                                                                                                                                                                                                                                                                                                           | RWE                   |
| Fujiwara N 2017[9]    | Hypertension              | Azisartan                                            | Conventional<br>angiotensin II<br>receptor<br>blocker | SBP -16.9 mmHg (SD 20.1);<br>DBP -8.9 mmHg (SD 11.6);<br>EQ5D score did not change; HRQoL scores such as the GDS and PSQI, especially in the female subgroup, were significantly improved by switching the ARB to azilsartan                                                                                                                                                                                               | Clinical Trial        |
| Schmieder RE 2017[10] | Uncontrolled hypertension | Fixed dose medication                                | -                                                     | Significant improvement in HRQoL: After 24 weeks of treatment, patients' assessment of their health status improved significantly, from 33.3% at baseline to 75.8% at follow-up.                                                                                                                                                                                                                                           | Observational study   |
| Brunström M 2018[11]  | Hypertension              | Antihypertensive therapy                             | -                                                     | Median follow-up time of 4 years: cardiovascular mortality rate 0.0309; Stroke rate: 0.0276                                                                                                                                                                                                                                                                                                                                | Meta-Analysis         |

|                        |              |                                   |                               |                                                                                                                                                                                                                                                                                                                                                 |                |
|------------------------|--------------|-----------------------------------|-------------------------------|-------------------------------------------------------------------------------------------------------------------------------------------------------------------------------------------------------------------------------------------------------------------------------------------------------------------------------------------------|----------------|
| Gupta A 2018[12]       | Hypertension | Amlodipine                        | Atenolol                      | All-cause mortality: HR 0.90, 95%CI 0.81 to 1.01 (BP lowering-arm);<br>Deaths from stroke: HR 0.71, 95%CI 0.53 to 0.97 (BP lowering-arm);<br>Cardiovascular deaths: HR 0.79, 95%CI 0.67 to 0.93 (BP lowering-arm)                                                                                                                               | RCT            |
| Kumar R 2019[13]       | Hypertension | Nebivolol                         | Bisoprolol                    | All-cause mortality: 9.8% vs 11.48%;<br>Cardiovascular mortality: 5.4% vs 7.0%;<br>All-cause hospitalization: 14.4% vs 16.3%;<br>Cardiovascular hospitalization: 9.8% vs 12.09%                                                                                                                                                                 | RCT            |
| Vukadinović D 2019[14] | Hypertension | Amlodipine                        | Placebo                       | Rate of edema: 16.6 vs. 6.2%, RR 2.9, 95%CI 2.50 to 3.36<br><i>Low/medium doses: RR 2.01, 95%CI 1.41 to 2.88;</i><br><i>High dose: RR 3.08, 95%CI 2.62 to 3.60</i><br>Incidence of headache: 7.9 vs. 10.9%, RR 0.77, 95%CI 0.65 to 0.90;<br><i>Low/medium doses: RR 0.52, 95% CI 0.40 to 0.69</i><br><i>High dose: RR 0.92, 95%CI 0.74-1.15</i> | Meta-analysis  |
| Zhao D 2019[15]        | Hypertension | Azisartan                         | Olmesartan                    | SBP MD -2.24 mmHg, 95%CI -4.03 to -0.44;<br>DBP MD -0.55 mmHg, 95%CI -1.76 to 0.66                                                                                                                                                                                                                                                              | Meta-analysis  |
| Geng Q 2020[16]        | Hypertension | Sacubitril/Valsartan              | Angiotensin receptor blockers | SBP: MD -1.58 mmHg, 95%CI -2.09 to -1.07;<br>DBP: MD -0.66 mmHg, 95%CI -0.98 to -0.33;<br><i>Subgroups: 200 mg/d SBP MD -4.94 mmHg, 95%CI -6.54 to -3.35; DBP MD -2.24 mm Hg, 95%CI -2.74 to -1.75;</i><br><i>400 mg/d SBP MD -6.25 mmHg, 95%CI -7.90 to -4.61; DBP MD -2.30 mmHg, 95%CI -2.80 to -1.80</i>                                     | Meta-Analysis  |
| Thacker H 2020[17]     | Hypertension | Perindopril/Indapamide/Amlodipine | -                             | SBP: 28.5 mmHg;<br>DBP: 13.8 mmHg;<br>QoL: improvement for all patients                                                                                                                                                                                                                                                                         | Clinical trial |

|                         |                          |                                                                                            |                                         |                                                                                                                                                                                                                                                                               |                           |
|-------------------------|--------------------------|--------------------------------------------------------------------------------------------|-----------------------------------------|-------------------------------------------------------------------------------------------------------------------------------------------------------------------------------------------------------------------------------------------------------------------------------|---------------------------|
| Katsi V 2021[18]        | Hypertension             | Azilsartan alone;<br>Azilsartan plus<br>chlorthalidone                                     | Placebo or<br>antihypertensive<br>drugs | 76% experienced an AE, with more events reported among patients who received add-on therapy. The most commonly reported AEs were dizziness (143%), headache (9.9%), fatigue (72%), upper respiratory tract infection (6.7%) and urinary tract infection (5.7%).               | Systematic<br>review      |
| Tahkola A 2021[19]      | Hypertension             | Not specified                                                                              | -                                       | Office SBP: -22 mmHg, 95% CI -27 to -18);<br>Office DBP: -13 mmHg, 95% CI -15 to -10);<br>Home SBP: -15 mmHg, 95% CI -18 to -11);<br>Home DBP: -10 mmHg, 95% CI -12 to -8);<br>HRQoL slightly deteriorated during the first treatment year                                    | RWE                       |
| Wang JG 2021[20]        | Hypertension             | Azilsartan<br>medoxomil/Olmesartan<br>/Telmisartan                                         | Valsartan                               | Azilsartan Medoxomil80mg: SBP:MD-9.9mmHG,95% CRI: -15.16 to -5.96<br>Olmesartan40mg: SBP:MD-5.8mmHG, 95% CRI: -11.07 to -2.03<br>Telmisartan80mg: SBP:MD-7.8mmHG95% CRI: -13.40 to -2.74                                                                                      | Network meta-<br>analysis |
| Bhardwaj RK<br>2022[21] | Diabetic<br>hypertension | Amlodipine,<br>Ramipril,<br>Telmisartan,<br>Combination of<br>ramipril with<br>telmisartan | -                                       | Amlodipine: HRQoL increased by 30.56% (95%CI: 14.30-10.90);<br>Ramipril: QoL increased by 30.94% (95%CI: 14.21-10.68);<br>Telmisartan: QoL increased by 28.07% (95%CI: 14.89-11.20)<br>Combination of ramipril with telmisartan: QoL increased by 28.84% (95%CI: 15.49-11.77) | RCT                       |
| Cho EJ 2023[22]         | Hypertension             | Telmisartan<br>/Amlodipine/Chlorth<br>alidone                                              | Telmisartan/<br>Amlodipine              | 48 (12.6%) patients are reported to showed treatment emergent adverse event.<br>Sitting SBP: -19.1 ± 14.9 mmHg vs -11.4 ± 14.7 mmHg<br>Treatment related AEs: 10.4% vs 5.3%; Dizziness 5.7% vs 2.1%;<br>Moderate AEs 3.1% vs 2.1%;<br>SAEs: 0.5% vs 0.5%                      | RCT                       |

|                  |                        |                                          |                        |                                                                                                                                                                                                                                                                                                                                            |               |
|------------------|------------------------|------------------------------------------|------------------------|--------------------------------------------------------------------------------------------------------------------------------------------------------------------------------------------------------------------------------------------------------------------------------------------------------------------------------------------|---------------|
| Han Y 2023[23]   | Hypertension           | Sacubitril/Valsartan                     | Olmesartan             | SBP: MD -7.03 mmHg, 95% CI -10.09 to -3.96;<br><i>Subgroups: 200 mg/d SBP MD -5.94 mmHg, 95% CI -9.39 to -2.49;<br/>400 mg/d SBP MD -9.73 mmHg, 95% CI -16.62 to -2.83</i><br>No significant difference in the likelihood of AEs and Es between groups except Headache (RR 0.58, 95%CI 0.36 to 0.92)                                       | Meta-analysis |
| Kim JH 2023[24]  | Advanced hypertension  | Olmesartan                               | Antihypertensive drugs | 3-year MACE: 9.4% vs 9.5%, HR 0.99 (95%CI 0.82 to 1.20);<br>All-cause mortality: 1.2% vs 1.3%, HR 0.95 (95%CI 0.56 to 1.61);<br>Myocardial infarction: 1.4% vs 1.5%, HR 0.92 (95%CI 0.56 to 1.51);<br>Stroke: 3.4% vs 2.7%, HR 1.25 (95%CI 0.89 to 1.73);<br>Hospitalization for heart failure: 5.9% vs 6.3%, HR 0.93 (95%CI 0.73 to 1.18) | RWE           |
| Zhang S 2023[25] | Hypertension           | Amlodipine/Losartan therapy              | Losartan               | Adverse events (50.0% vs. 51.7%, P = 0.819);<br><i>Mild AEs (44.8% vs. 47.0%, P = 0.731), moderate (4.5% vs. 3.3%, P = 0.770), severe (0.6% vs. 1.3%, P = 0.620);</i><br>Only mild ADRs occurred, 5.2% vs. 6.6%, P = 0.635                                                                                                                 | RCT           |
| Cui Z 2024[26]   | Essential hypertension | Olmesartan medoxomil-amlodipine besylate | -                      | AEs: nervous system disorders (12.9%), vascular disorders (8.7%), general disorders and administration site conditions (5.4%);<br>SAEs: vascular disorders (0.4%);<br>Drug-related AEs: nervous system disorders (4.6%), vascular disorders (2.6%), general disorders and administration site conditions (2.3%)                            | RWE           |
| Sun Y 2024[27]   | Hypertension           | Sacubitril/Valsartan                     | Olmesartan             | SBP: MD -4.58 mmHg, 95% CI -7.90 to -1.25;<br>DBP: MD -1.70 mmHg, 95% CI -3.24 to -0.17;<br>Pulse pressure: MD -2.31 mmHg, 95% CI -4.41 to -0.21;<br>Adverse events: OR 1.06, 95% CI 0.90 to 1.24                                                                                                                                          | Meta-analysis |

“—”: not mentioned in the literature; RCT: randomized controlled trial; RWE: real-world evidence; HRQoL: health-related quality of life; SBP: systolic blood pressure; DBP: diastolic blood pressure; HF: heart failure; MACE: major adverse cardiovascular events; AEs: adverse events; SAEs: serious adverse events; SD: standard deviation; CI: confidence interval; MD: mean difference; RR: relative risk; HR: hazard ratio

## References

1. ALLHAT Officers and Coordinators for the ALLHAT Collaborative Research Group. Major outcomes in high-risk hypertensive patients randomized to angiotensin-converting enzyme inhibitor or calcium channel blocker vs diuretic: the Antihypertensive and Lipid-Lowering Treatment to Prevent Heart Attack Trial (ALLHAT). *JAMA*. 2002;288(23):2981-97.
2. Dahlöf B, Devereux RB, Kjeldsen SE, Julius S, Beevers G, de Faire U, et al. Cardiovascular morbidity and mortality in the Losartan Intervention For Endpoint reduction in hypertension study (LIFE): a randomised trial against atenolol. *Lancet*. 2002;359(9311):1004-10.
3. Julius S, Kjeldsen SE, Weber M, Brunner HR, Ekman S, Hansson L, et al. Outcomes in hypertensive patients at high cardiovascular risk treated with regimens based on valsartan or amlodipine: the VALUE randomised trial. *Lancet*. 2004;363(9426):2022-31.
4. White WB, Weber MA, Sica D, Bakris GL, Perez A, Cao C, et al. Effects of the angiotensin receptor blocker azilsartan medoxomil versus olmesartan and valsartan on ambulatory and clinic blood pressure in patients with stages 1 and 2 hypertension. *Hypertension*. 2011;57(3):413-20.
5. Trevisol DJ, Moreira LB, Fuchs FD, Fuchs SC. Health-related quality of life is worse in individuals with hypertension under drug treatment: results of population-based study. *J Hum Hypertens*. 2012;26(6):374-80.
6. Hu D, Liu L, Li W. Efficacy and safety of valsartan/amlodipine single-pill combination in 11,422 Chinese patients with hypertension: an observational study. *Adv Ther*. 2014;31(7):762-75.
7. Wong MC, Tam WW, Lao XQ, Wang HH, Kwan MW, Cheung CS, et al. The effectiveness of metoprolol versus atenolol on prevention of all-cause and cardiovascular mortality in a large Chinese population: a cohort study. *Int J Cardiol*. 2014;175(3):425-32.
8. Mohan JC, Jain R, Chamle V, Bhargava A. Short term safety and tolerability of a fixed dose combination of Olmesartan, Amlodipine and Hydrochlorothiazide. *Clin Diagn Res*. 2015;9(8):OC10-3.
9. Fujiwara N, Tanaka A, Kawaguchi A, Tago M, Oyama JI, Uchida Y, et al. Association between blood pressure lowering and quality of life by treatment of Azilsartan. *Int Heart J*. 2017;58(5):752-61.
10. Schmieder RE, Jumar A, Fronk EM, Alexandre AF, Bramlage P. Quality of life and emotional impact of a fixed-dose combination of antihypertensive drugs in patients with uncontrolled hypertension. *J Clin Hypertens (Greenwich)*. 2017;19(2):126-34.
11. Brunström M, Carlberg B. Association of blood pressure lowering with mortality and cardiovascular disease across blood pressure levels: a systematic review and meta-analysis. *JAMA Intern Med*. 2018;178(1):28-36.
12. Gupta A, Mackay J, Whitehouse A, Godec T, Collier T, Pocock S, et al. Long-term mortality after blood pressure-lowering and lipid-lowering treatment in patients with hypertension in the Anglo-Scandinavian Cardiac Outcomes Trial (ASCOT) Legacy study: 16-year follow-up results of a randomised factorial trial. *Lancet*. 2018;392(10153):1127-37.
13. Kumar R, Mal K, Begum J, Shaukat F. Comparison of Nebivolol and Bisoprolol for cardiovascular mortality in hypertensive patients. *Cureus*. 2019;11(12):e6453.
14. Vukadinović D, Scholz SS, Messerli FH, Weber MA, Williams B, Böhm M, et al. Peripheral edema and headache associated with amlodipine treatment: a meta-analysis of randomized, placebo-controlled trials. *J Hypertens*. 2019;37(10):2093-103.
15. Zhao D, Liu H, Dong P. Antihypertensive effect of azilsartan versus olmesartan in patients with essential hypertension: a meta-analysis. *Ir J Med Sci*. 2019;188(2):481-8.

16. Geng Q, Yan R, Wang Z, Hou F. Effects of LCZ696 (Sacubitril/Valsartan) on blood pressure in patients with hypertension: a meta-analysis of randomized controlled trials. *Cardiology*. 2020;145(9):589-98.
17. Thacker H, Konda Reddy KM, Murthy LS, Sawhney JP, Chaudhary G, Shah S, et al. Blood-pressure Lowering Efficacy and Safety of Perindopril / Indapamide / Amlodipine single-pill combination in hypertensive patients: phase III trial in India. *J Assoc Physicians India*. 2020;68(10):39-43.
18. Katsi V, Michalakeas C, Soulaïdopoulos S, Antonopoulos AS, Vlachopoulos C, Tousoulis D, et al. Evaluating the safety and tolerability of Azilsartan Medoxomil alone or in combination with Chlorthalidone in the management of hypertension: a systematic review. *Curr Hypertens Rev*. 2021;17(3):217-27.
19. Tahkola A, Korhonen P, Kautiainen H, Niiranen T, Mäntyselkä P. The impact of antihypertensive treatment initiation on health-related quality of life and cardiovascular risk factor levels: a prospective, interventional study. *BMC Cardiovasc Disord*. 2021;21(1):444.
20. Wang JG, Zhang M, Feng YQ, Ma CS, Wang TD, Zhu ZM, et al. Is the newest angiotensin-receptor blocker azilsartan medoxomil more efficacious in lowering blood pressure than the older ones? A systematic review and network meta-analysis. *J Clin Hypertens (Greenwich)*. 2021;23(5):901-14.
21. Bhardwaj RK, Kazal HL, Kohli K, Raj R, Bansal N, Singh B, et al. Effects of antihypertensive agents on the quality of life in diabetic hypertensive patients: A prospective study. *Perspect Clin Res*. 2022;13(3):137-44.
22. Cho EJ, Kim MH, Kim YH, Chang K, Choi DJ, Kang WC, et al. Efficacy and safety of standard dose triple combination of telmisartan 80 mg/amlodipine 5 mg/chlorthalidone 25 mg in primary hypertension: a randomized, double-blind, active-controlled, multicenter phase 3 trial. *J Clin Hypertens (Greenwich)*. 2023;25(9):817-27.
23. Han Y, Zhou Y, Na J, Li F, Sun Y. Efficacy and safety comparative of Sacubitril/Valsartan vs. Olmesartan in the treatment of hypertension: a meta-analysis of RCTs. *Am J Hypertens*. 2023;36(12):643-50.
24. Kim JH, Joo HJ, Chung SH, Yum Y, Kim YH, Kim EJ. Safety and cardiovascular effectiveness of olmesartan in combination therapy for advanced hypertension: an electronic health record-based cohort study. *J Hypertens*. 2023;41(10):1578-84.
25. Zhang S, Li Y, Xu X, Xu R, Zhang L, Wan X, et al. Efficacy and safety of single-pill amlodipine/losartan versus losartan in patients with inadequately controlled hypertension after losartan treatment: a multicenter, double-blind, randomized phase III clinical trial. *Front Cardiovasc Med*. 2023;10:1177166.
26. Cui Z, Qiu Z, Cheng W, Hu W, Ma G, Cai X, et al. Efficacy and safety of olmesartan medoxomil-amlodipine besylate tablet in Chinese patients with essential hypertension: A prospective, single-arm, multi-center, real-world study. *J Clin Hypertens (Greenwich)*. 2024;26(1):5-16.
27. Sun Y, Yang H. Comparison of sacubitril/valsartan with olmesartan for hypertension: A meta-analysis of randomized controlled trials. *Medicine (Baltimore)*. 2024;103(14):e37501.

## **Electronic Supplementary File 2. Explanations of attributes and levels in the discrete choice experiment**

Control of systolic blood pressure (SBP): Effective control of SBP is a critical outcome measure for antihypertensive drugs. This attribute quantifies the expected SBP decrease versus no treatment or placebo and is defined at three levels: 10 mmHg, 20 mmHg, or 30 mmHg reduction.

Change in health-related quality of life (HRQoL): This attribute is an important patient-reported outcome. It measures the change in multidimensional functioning (physical, psychological, functional, and social domains) relative to no medication after initiating therapy, with three defined levels: worsened, unchanged, or improved.

Incidence of common side effects: This attribute quantifies the occurrence of common, typically mild-to-moderate adverse drug reactions (e.g., dizziness, headache, cough, nausea, diarrhea) that can be self-managed. There are three levels for the attribute: 1%, 8%, or 15%.

Five-year risk of stroke: Hypertension is a major risk factor for stroke. This attribute quantifies the absolute reduction in five-year stroke risk with the antihypertensive drug versus placebo or no treatment, defined at three levels: 1%, 4%, and 7%.

Five-year mortality due to cardiovascular diseases (CVD): Hypertension significantly contributes to cardiovascular disease and mortality. Antihypertensive therapy might decrease the mortality associated with cardiovascular disease. This attribute represents the absolute reduction in probability of cardiovascular death within five years versus no treatment, defined at three levels: 1%, 4%, or 7%.

Out-of-pocket costs per year if reimbursed: This attribute quantifies the annual patient copayment if the new drug is covered by public health insurance. The attribute is defined across three levels: low at ¥400, medium at ¥2,300, and high at ¥4,200.

## Electronic Supplementary Figure 1. Questionnaire of the survey (Block 1)

**Survey Location:** \_\_\_\_\_ **Survey Date:** \_\_\_\_ Month \_\_\_\_ Day  
 Outpatient       Inpatient      **Outpatient/Inpatient Number:** \_\_\_\_\_

**Interviewer Signature:** \_\_\_\_\_

**Department for enrolling hypertensive patients:** Cardiology, Endocrinology, Neurology, Neurosurgery, General Practice

### Informed Consent Form

The purpose of this survey is to understand your priorities for the health insurance coverage of antihypertensive drugs. We promise to keep your information completely confidential.

Please sign the informed consent form to indicate your agreement to participate.

Thank you for your cooperation and support!

**Patient Signature:** \_\_\_\_\_

### Survey on Health Insurance Coverage Priorities of Antihypertensive Drugs

Your answers are for academic research only, and you do not need to worry about the disclosure of personal privacy. You can refuse to participate in the survey if you are not willing to.

Please answer the questions according to your actual views and preferences. Please note that your carelessness will lead to incorrect information for decisionmakers, which may affect your own benefits of healthcare.

Our research team will give you a small gift as a token of appreciation.

Thank you very much for your support!

**Center for Evidence-Based Medicine, Medical School of Nantong University**

### Part 1: Demographic information and clinical characteristics

1. **Gender:**  Male       Female

2. **Age:** \_\_\_\_\_ years old

3. **Education:**

Unschooling       Primary school       Junior high school       High school

Junior college or Higher vocational college       Bachelor's degree

Master's degree or above

**4. Occupation:**

- Civil Servant     Staffing of public institution     Company employee  
 Factory worker     Farmer     Unemployed     Retiree  
 Freelancers (self-employed, temporary stallholder, freelance writer, etc.)  
 Other type: \_\_\_\_\_

**5. Marital status:**

- Single     Married     Divorced     Widowed

**6. Monthly household income (gross income):**

- ≤2000 CNY     2001~4000 CNY     4001~6000 CNY     6001~8000 CNY  
 8001~10000 CNY     10001~12000 CNY     >12000 CNY

**7. Type of health insurance:**

- Urban Employees Basic Medical Insurance  
 Urban-Rural Residents Basic Medical Insurance (including former New Rural Cooperative Medical Insurance, and former Urban Residents Basic Medical Insurance)  
 Commercial Health Insurance  
 Other types: \_\_\_\_\_

**8. Overall satisfaction with your public health insurance:**

- Very dissatisfied     Somewhat Dissatisfied     Neither satisfied nor dissatisfied  
 Somewhat satisfied     Very satisfied

**9. Years since hypertension diagnosis:** \_\_\_\_\_

Note: If just diagnosed, write "initial"; if diagnosed within 1 year, specify in "months"; if diagnosed for more than 1 year, specify in "years, months"; please include the unit of time.

**10. Smoking:**

- Currently smoking     Used to smoke but quit now     Never smoked

**11. Have you ever experienced side effects from antihypertensive drugs?**

- Yes     No

## Medical history and clinical symptoms (Checked by Interviewers)

### 1. Primary diagnosis for admission to hospital or primary healthcare centers:

\_\_\_\_\_

### 2. The type of hypertension that the patient has been diagnosed:

Primary hypertension       Secondary hypertension       Pulmonary hypertension

### 3. Untreated office blood pressure of the patient:

Systolic blood pressure \_\_\_\_\_ mmHg

Diastolic blood pressure \_\_\_\_\_ mmHg

### 4. Other types of chronic diseases the patient has:

- Diabetes       Heart failure       Coronary heart disease       Stroke
- Hyperlipidemia       Chronic hepatitis       Angina pectoris       Myocardial infarction
- Chronic respiratory system disease       Chronic digestive system disease
- Chronic kidney disease       Neurological disease
- Other chronic diseases (name of disease) \_\_\_\_\_
- No other diseases

The longest duration of any of the above diseases: \_\_\_\_\_ years

### 5. The current antihypertensive therapies (Please specify drug names and dosages):

\_\_\_\_\_

## Part 2: Assessment of health-related quality of life

1. Please "√" in the following table according to your actual feeling and health condition

|                                                                                | Best <span style="display: inline-block; width: 100px; border-bottom: 1px solid black;"></span> Worst |                 |                   |                 |              |
|--------------------------------------------------------------------------------|-------------------------------------------------------------------------------------------------------|-----------------|-------------------|-----------------|--------------|
|                                                                                | No problems                                                                                           | Slight problems | Moderate problems | Severe problems | Unable to do |
| ① Mobility                                                                     |                                                                                                       |                 |                   |                 |              |
| ② Self-care (e.g. washing, dressing yourself)                                  |                                                                                                       |                 |                   |                 |              |
| ③ Usual activities (e.g. work, study, housework, family or leisure activities) |                                                                                                       |                 |                   |                 |              |

|                      | Best <span style="display: inline-block; width: 100px; border-bottom: 1px solid black;"></span> Worst |          |            |          |           |
|----------------------|-------------------------------------------------------------------------------------------------------|----------|------------|----------|-----------|
|                      | No                                                                                                    | Slightly | Moderately | Severely | Extremely |
| ④ Pain/Discomfort    |                                                                                                       |          |            |          |           |
| ⑤ Anxiety/Depression |                                                                                                       |          |            |          |           |

2. Mark an X on the scale to indicate how your health

- 100 means the best health you can imagine.
- 0 means the worst health you can imagine.

Please write the number you marked on the scale in the box below.

Your health today =

Source of the measurement scale: EuroQol Research Foundation. EQ-5D-5L User Guide, 2019.

Available from: <https://euroqol.org/publications/user-guides>

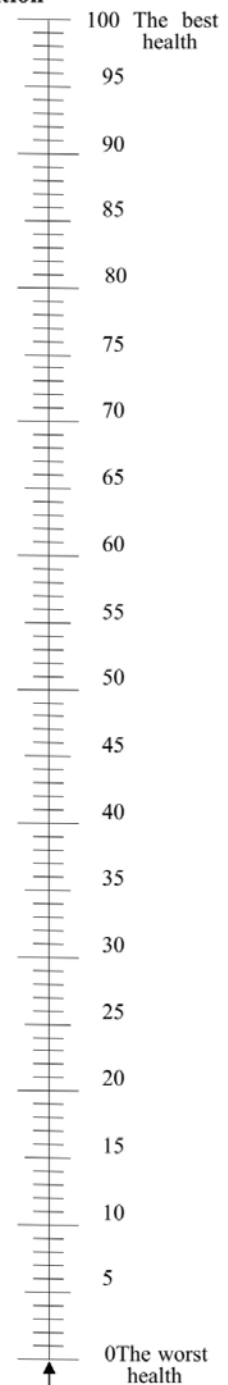

Please mark an X on the scale to indicate how your health is today.

### Part 3: Preferences for health insurance coverage of antihypertensive drugs

Assuming there are currently two new antihypertensive drugs, A and B, neither of which has been covered by public health insurance. At present, only one of these drugs can be reimbursed by health insurance programs.

Please carefully read all the items and then select the new drug that is most worthy of been reimbursed by the health insurance, and mark a "√" in the corresponding box.

#### Scenario 1

| Attributes                                                                                                              | Drug A                                                                                                                      | Drug B                                                                                                                        |
|-------------------------------------------------------------------------------------------------------------------------|-----------------------------------------------------------------------------------------------------------------------------|-------------------------------------------------------------------------------------------------------------------------------|
| Control of systolic blood pressure                                                                                      | Decreased by 20mmHg                                                                                                         | Decreased by 10mmHg                                                                                                           |
| Change in health-related quality of life                                                                                | <br><input type="text" value="No change"/> | <br><input type="text" value="No change"/> |
| Incidence of common side effects<br> | 8%                                                                                                                          | 1%                                                                                                                            |
| Five-year risk of stroke<br>         | 1%                                                                                                                          | 7%                                                                                                                            |
| Five-year mortality due to cardiovascular diseases                                                                      | 1%                                                                                                                          | 7%                                                                                                                            |
| Out-of-pocket costs per year if reimbursed                                                                              | <br>CNY 2300 per year                   | <br>CNY 4200 per year                    |
| Which drug is worthier to be covered by public health insurance? Your choice                                            |                                                                                                                             |                                                                                                                               |

### Scenario 2

| Attributes                                                                                                            | Drug A                                                                                                                        | Drug B                                                                                                                           |
|-----------------------------------------------------------------------------------------------------------------------|-------------------------------------------------------------------------------------------------------------------------------|----------------------------------------------------------------------------------------------------------------------------------|
| Control of systolic blood pressure                                                                                    | Decreased by 30mmHg                                                                                                           | Decreased by 20mmHg                                                                                                              |
| Change in health-related quality of life                                                                              |  <p style="text-align: center;">Improved</p> |  <p style="text-align: center;">No change</p> |
| Incidence of common side effects<br> | 15%                                                                                                                           | 1%                                                                                                                               |
| Five-year risk of stroke<br>       | 4%                                                                                                                            | 1%                                                                                                                               |
| Five-year mortality due to cardiovascular diseases                                                                    | 1%                                                                                                                            | 7%                                                                                                                               |
| Out-of-pocket costs per year if reimbursed                                                                            | <br>CNY 4200 per year                     | <br>CNY 2300 per year                       |
| Which drug is worthier to be covered by public health insurance? Your choice                                          |                                                                                                                               |                                                                                                                                  |

### Scenario 3

| Attributes                                                                                                             | Drug A                                                                                                                                                                                                                                   | Drug B                                                                                                                                                                                                                                     |
|------------------------------------------------------------------------------------------------------------------------|------------------------------------------------------------------------------------------------------------------------------------------------------------------------------------------------------------------------------------------|--------------------------------------------------------------------------------------------------------------------------------------------------------------------------------------------------------------------------------------------|
| Control of systolic blood pressure                                                                                     | Decreased by 10mmHg                                                                                                                                                                                                                      | Decreased by 20mmHg                                                                                                                                                                                                                        |
| Change in health-related quality of life                                                                               | 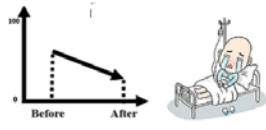 <div style="border: 1px solid black; border-radius: 10px; background-color: #ffffcc; padding: 5px; text-align: center; margin-top: 10px;">Worsen</div> |  <div style="border: 1px solid black; border-radius: 10px; background-color: #ffffcc; padding: 5px; text-align: center; margin-top: 10px;">Worsen</div> |
| Incidence of common side effects<br> | 1%                                                                                                                                                                                                                                       | 15%                                                                                                                                                                                                                                        |
| Five-year risk of stroke<br>        | 4%                                                                                                                                                                                                                                       | 7%                                                                                                                                                                                                                                         |
| Five-year mortality due to cardiovascular diseases                                                                     | 4%                                                                                                                                                                                                                                       | 7%                                                                                                                                                                                                                                         |
| Out-of-pocket costs per year if reimbursed                                                                             | <br>CNY 4200 per year                                                                                                                                | <br>CNY 2300 per year                                                                                                                                 |
| Which drug is worthier to be covered by public health insurance? Your choice                                           |                                                                                                                                                                                                                                          |                                                                                                                                                                                                                                            |

### Scenario 4

| Attributes                                                                                                             | Drug A                                                                                                                                    | Drug B                                                                                                                                     |
|------------------------------------------------------------------------------------------------------------------------|-------------------------------------------------------------------------------------------------------------------------------------------|--------------------------------------------------------------------------------------------------------------------------------------------|
| Control of systolic blood pressure                                                                                     | Decreased by 30mmHg                                                                                                                       | Decreased by 20mmHg                                                                                                                        |
| Change in health-related quality of life                                                                               | 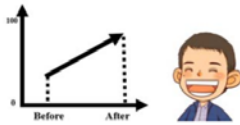 <p style="text-align: center;"><b>improved</b></p>      |  <p style="text-align: center;"><b>No change</b></p>    |
| Incidence of common side effects<br> | 8%                                                                                                                                        | 1%                                                                                                                                         |
| Five-year risk of stroke<br>        | 4%                                                                                                                                        | 7%                                                                                                                                         |
| Five-year mortality due to cardiovascular diseases                                                                     | 1%                                                                                                                                        | 4%                                                                                                                                         |
| Out-of-pocket costs per year if reimbursed                                                                             |  <p style="text-align: center;">CNY 2300 per year</p> |  <p style="text-align: center;">CNY 2300 per year</p> |
| Which drug is worthier to be covered by public health insurance? Your choice                                           |                                                                                                                                           |                                                                                                                                            |

### Scenario 5

| Attributes                                                                                                             | Drug A                                                                                                                                                                                                                       | Drug B                                                                                                                                                                                                                           |
|------------------------------------------------------------------------------------------------------------------------|------------------------------------------------------------------------------------------------------------------------------------------------------------------------------------------------------------------------------|----------------------------------------------------------------------------------------------------------------------------------------------------------------------------------------------------------------------------------|
| Control of systolic blood pressure                                                                                     | Decreased by 20mmHg                                                                                                                                                                                                          | Decreased by 20mmHg                                                                                                                                                                                                              |
| Change in health-related quality of life                                                                               | 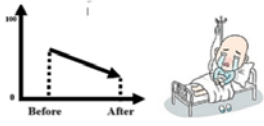 <p style="text-align: center; border: 1px solid black; border-radius: 10px; padding: 5px; width: fit-content; margin: 0 auto;">Worsen</p> |  <p style="text-align: center; border: 1px solid black; border-radius: 10px; padding: 5px; width: fit-content; margin: 0 auto;">No change</p> |
| Incidence of common side effects<br> | 8%                                                                                                                                                                                                                           | 15%                                                                                                                                                                                                                              |
| Five-year risk of stroke<br>        | 7%                                                                                                                                                                                                                           | 4%                                                                                                                                                                                                                               |
| Five-year mortality due to cardiovascular diseases                                                                     | 4%                                                                                                                                                                                                                           | 4%                                                                                                                                                                                                                               |
| Out-of-pocket costs per year if reimbursed                                                                             | <br>CNY400 per year                                                                                                                       | <br>CNY 4200 per year                                                                                                                       |
| Which drug is worthier to be covered by public health insurance? Your choice                                           |                                                                                                                                                                                                                              |                                                                                                                                                                                                                                  |

### Scenario 6

| Attributes                                                                                                             | Drug A                                                                                                                        | Drug B                                                                                                                           |
|------------------------------------------------------------------------------------------------------------------------|-------------------------------------------------------------------------------------------------------------------------------|----------------------------------------------------------------------------------------------------------------------------------|
| Control of systolic blood pressure                                                                                     | Decreased by 20mmHg                                                                                                           | Decreased by 20mmHg                                                                                                              |
| Change in health-related quality of life                                                                               |  <p style="text-align: center;">improved</p> |  <p style="text-align: center;">No change</p> |
| Incidence of common side effects<br> | 15%                                                                                                                           | 8%                                                                                                                               |
| Five-year risk of stroke<br>        | 7%                                                                                                                            | 1%                                                                                                                               |
| Five-year mortality due to cardiovascular diseases                                                                     | 1%                                                                                                                            | 4%                                                                                                                               |
| Out-of-pocket costs per year if reimbursed                                                                             | <br>CNY400 per year                        | <br>CNY 4200 per year                       |
| Which drug is worthier to be covered by public health insurance? Your choice                                           |                                                                                                                               |                                                                                                                                  |

### Scenario 7

| Attributes                                                                                                            | Drug A                                                                                                                         | Drug B                                                                                                                          |
|-----------------------------------------------------------------------------------------------------------------------|--------------------------------------------------------------------------------------------------------------------------------|---------------------------------------------------------------------------------------------------------------------------------|
| Control of systolic blood pressure                                                                                    | Decreased by 20mmHg                                                                                                            | Decreased by 10mmHg                                                                                                             |
| Change in health-related quality of life                                                                              |  <p style="text-align: center;">No change</p> |  <p style="text-align: center;">Improved</p> |
| Incidence of common side effects<br> | 1%                                                                                                                             | 8%                                                                                                                              |
| Five-year risk of stroke<br>       | 4%                                                                                                                             | 1%                                                                                                                              |
| Five-year mortality due to cardiovascular diseases                                                                    | 4%                                                                                                                             | 4%                                                                                                                              |
| Out-of-pocket costs per year if reimbursed                                                                            | <br>CNY400 per year                         | <br>CNY400 per year                        |
| Which drug is worthier to be covered by public health insurance? Your choice                                          |                                                                                                                                |                                                                                                                                 |

### Scenario 8

| Attributes                                                                                                             | Drug A                                                                                                                             | Drug B                                                                                                                                  |
|------------------------------------------------------------------------------------------------------------------------|------------------------------------------------------------------------------------------------------------------------------------|-----------------------------------------------------------------------------------------------------------------------------------------|
| Control of systolic blood pressure                                                                                     | Decreased by 20mmHg                                                                                                                | Decreased by 20mmHg                                                                                                                     |
| Change in health-related quality of life                                                                               | 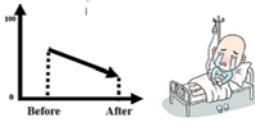 <p style="text-align: center;"><b>Worsen</b></p> |  <p style="text-align: center;"><b>No change</b></p> |
| Incidence of common side effects<br> | 1%                                                                                                                                 | 15%                                                                                                                                     |
| Five-year risk of stroke<br>        | 1%                                                                                                                                 | 4%                                                                                                                                      |
| Five-year mortality due to cardiovascular diseases                                                                     | 4%                                                                                                                                 | 1%                                                                                                                                      |
| Out-of-pocket costs per year if reimbursed                                                                             | <br>CNY 2300 per year                          | <br>CNY400 per year                                |
| Which drug is worthier to be covered by public health insurance? Your choice                                           |                                                                                                                                    |                                                                                                                                         |

Are you confident in your choice of the new drug to be covered by health insurance programs? Please select a level from zero to 10 and give a tick '√' in the score to represent your confidence:

|                         |   |   |   |   |   |                         |   |   |   |    |
|-------------------------|---|---|---|---|---|-------------------------|---|---|---|----|
| 0: not confident at all |   |   |   |   |   | 10: extremely confident |   |   |   |    |
| 0                       | 1 | 2 | 3 | 4 | 5 | 6                       | 7 | 8 | 9 | 10 |
| 👎                       |   |   |   |   |   | 👍                       |   |   |   |    |

### Electronic Supplementary File 3. Sensitivity analysis of main effects

| Attributes                                 | Coefficients     |                 |
|--------------------------------------------|------------------|-----------------|
|                                            | $\beta$ (SE)     | SD (SE)         |
| Control of SBP                             |                  |                 |
| Decreases by 10 mmHg (ref)                 | -0.798***(0.073) |                 |
| Decreases by 20 mmHg                       | -0.047(0.052)    | 0.044(0.192)    |
| Decreases by 30 mmHg                       | 0.845***(0.079)  | 0.988***(0.093) |
| Change in HRQoL                            |                  |                 |
| Worse (ref)                                | -1.291***(0.101) |                 |
| No change                                  | 0.273***(0.049)  | 0.439***(0.100) |
| Improved                                   | 1.030***(0.092)  | 1.275***(0.107) |
| Incidence of common side effects           |                  |                 |
| 15% (ref)                                  | -0.946***(0.074) |                 |
| 8%                                         | -0.054(0.047)    | 0.054(0.271)    |
| 1%                                         | 1.000***(0.072)  | 0.669***(0.081) |
| Five-year risk of stroke                   |                  |                 |
| 7% (ref)                                   | -0.505***(0.058) |                 |
| 4%                                         | 0.103*(0.052)    | 0.220(0.147)    |
| 1%                                         | 0.402***(0.061)  | 0.538***(0.099) |
| Five-year mortality due to CVD             |                  |                 |
| 7% (ref)                                   | -0.785***(0.069) |                 |
| 4%                                         | 0.170*(0.065)    | 0.019(0.129)    |
| 1%                                         | 0.616***(0.070)  | 0.535***(0.093) |
| Out-of-pocket costs per year if reimbursed |                  |                 |
| Cost (per CNY200)                          | -0.114***(0.009) | 0.135***(0.011) |
| Const                                      | 0.098***(0.027)  |                 |
| Log likelihood                             |                  | -3241.985       |
| Participants                               |                  | 821             |
| Observations                               |                  | 13,136          |

SBP, systolic blood pressure; HRQoL, health-related quality of life; CVD, cardiovascular disease; SE, standard error; SD, standard deviation; \*p<0.05; \*\*\*p<0.001.

**Electronic Supplementary File 4. Model estimation of the interaction effects (SD and its SE)**

| Attributes                                        | Model 1 (Income) | Model2 (Age)     | Model 3 (Insurance) | Model 4 (SBP)   |
|---------------------------------------------------|------------------|------------------|---------------------|-----------------|
|                                                   | SD (SE)          | SD (SE)          | SD (SE)             | SD (SE)         |
| <b>Control of SBP</b>                             |                  |                  |                     |                 |
| Decreases by 20 mmHg                              | 0.004(0.167)     | 0.036 (0.215)    | 0.041(0.073)        | 0.018(0.188)    |
| Decreases by 30 mmHg                              | 0.950***(0.095)  | 0.973*** (0.098) | 0.997***(0.099)     | 0.980***(0.097) |
| <b>Change in HRQoL</b>                            |                  |                  |                     |                 |
| No change                                         | 0.432***(0.103)  | 0.454*** (0.105) | 0.482***(0.100)     | 0.444***(0.104) |
| Improved                                          | 1.236***(0.105)  | 1.301***(0.112)  | 1.310***(0.109)     | 1.312***(0.109) |
| <b>Incidence of common side effects</b>           |                  |                  |                     |                 |
| 8%                                                | 0.080(0.190)     | 0.009(0.314)     | 0.052(0.355)        | 0.107(0.248)    |
| 1%                                                | 0.691***(0.081)  | 0.702***(0.085)  | 0.685***(0.084)     | 0.692***(0.083) |
| <b>Five-year risk of stroke</b>                   |                  |                  |                     |                 |
| 4%                                                | 0.167 (0.195)    | 0.220 (0.147)    | 0.018(0.255)        | 0.232(0.147)    |
| 1%                                                | 0.511***(0.102)  | 0.539***(0.102)  | 0.606***(0.100)     | 0.545***(0.106) |
| <b>Five-year mortality due to CVD</b>             |                  |                  |                     |                 |
| 4%                                                | 0.027 (0.130)    | 0.011 (0.132)    | 0.012(0.130)        | 0.210(0.083)    |
| 1%                                                | 0.542***(0.094)  | 0.556***(0.098)  | 0.573***(0.098)     | 0.553***(0.097) |
| <b>Out-of-pocket costs per year if reimbursed</b> |                  |                  |                     |                 |
| Cost (per CNY200)                                 | 0.132***(0.011)  | 0.139***(0.012)  | 0.134***(0.011)     | 0.138***(0.011) |

SBP, systolic blood pressure; HRQoL, health-related quality of life; CVD, cardiovascular disease; SE, standard error; SD, standard deviation; \*\*\*p<0.001.

Age: Age 70 or less=0, age > 70=1; monthly household income: CNY 6000 or less=0, More than CNY 6000=1; type of insurance: Urban Employee Basic Medical Insurance enrollees =0, Urban and Rural Resident Basic Medical Insurance enrollees =1; SBP: Less than 160 mmHg =0, 160 mmHg or more =1.

## Electronic Supplementary File 5. Marginal willingness to pay for antihypertensive drugs

| Attributes                                    | Willingness-to pay (95% CI) |
|-----------------------------------------------|-----------------------------|
| Control of SBP                                |                             |
| From decrease by 10mmHg to decrease by 20mmHg | 1324***(971-1678)           |
| From decrease by 10mmHg to decrease by 30mmHg | 2919***(2429-3410)          |
| Change in HRQoL                               |                             |
| HRQoL from worse to no change                 | 2761***(2313-3209)          |
| HRQoL from worse to improvement               | 4049***(3418-4681)          |
| Incidence of common side effects              |                             |
| From 8% to 1%                                 | 1498***(1146-1851)          |
| From 15% to 1%                                | 3373***(2831-3916)          |
| Five-year risk of stroke                      |                             |
| From 4% to 1%                                 | 1084***(763-1406)           |
| From 7% to 1%                                 | 1621***(1214-2029)          |
| Five-year mortality due to CVD                |                             |
| From 4% to 1%                                 | 1600***(1251-1951)          |
| From 7% to 1%                                 | 2415***(1933-2898)          |

SBP: systolic blood pressure; HRQoL: health-related quality of life; CVD: cardiovascular disease;  
 \*\*\*p<0.001.

## Electronic Supplementary File 6. Marginal willingness to pay by income

| Attributes                                    | Lower income       | Higher income       |
|-----------------------------------------------|--------------------|---------------------|
| Control of SBP                                |                    |                     |
| From decrease by 10mmHg to decrease by 20mmHg | 1396***(1035-1758) | 1218***(95-2342)    |
| From decrease by 10mmHg to decrease by 30mmHg | 3071***(2556-3586) | 2884***(1409-4360)  |
| Change in HRQoL                               |                    |                     |
| HRQoL from worse to no change                 | 2086***(1699-2474) | 6151***(3736-8565)  |
| HRQoL from worse to improvement               | 2931***(2396-3466) | 9913***(6104-13721) |
| Incidence of common side effects              |                    |                     |
| From 8% to 1%                                 | 1290***(945-1634)  | 2787***(1374-4200)  |
| From 15% to 1%                                | 2818***(2316-3320) | 6829***(4051-9607)  |
| Five-year risk of stroke                      |                    |                     |
| From 4% to 1%                                 | 883***(564-1202)   | 2400***(1070-3731)  |
| From 7% to 1%                                 | 1248***(864-1632)  | 4169***(2104-6233)  |
| Five-year mortality due to CVD                |                    |                     |
| From 4% to 1%                                 | 1353***(1009-1697) | 3171***(1817-4525)  |
| From 7% to 1%                                 | 2129***(1666-2593) | 4316***(2193-6440)  |

SBP: systolic blood pressure; HRQoL: health-related quality of life; CVD: cardiovascular disease; Lower income: monthly household income CNY 6000 or less, Higher income: monthly household income over CNY 6000; \*\*\*p<0.001.
